# Supplementary material for: Biflavonoids from Selaginella doederleinii as Potential Antitumor Agents for Intervention of Non-Small Cell Lung Cancer
Source: MDPI journal article supplement (doi:10.3390/molecules26175401), 2021-09-05
Supplement: s1 [file s1]

# Supplementary Information

## **Biflavonoids from *Selaginella doederleinii* as potential antitumor agents for intervention of non-small-cell lung cancer**

Fenghua Kang,<sup>1,2,3</sup> Sha Zhang,<sup>1,2,3</sup> Dekun Chen,<sup>1,2,3</sup> Jianbing Tan,<sup>1,2,3</sup> Min Kuang,<sup>1,2,3</sup>  
Jinlin Zhang,<sup>1,2,3</sup> Guangyuan Zeng,<sup>1,2,3</sup> Kangping Xu,<sup>1,2,3</sup> Zhenxing Zou<sup>1,2,3\*</sup> and  
Guishan Tan<sup>1,2,3\*</sup>

<sup>1</sup> *Xiangya School of Pharmaceutical Sciences, Central South University, Changsha 410013, PR China.*

<sup>2</sup> *Xiangya Hospital of Central South University, Changsha 410008, PR China.*

<sup>3</sup> *Hunan Key laboratory of Diagnostic and Therapeutic Drug Research for Chronic Diseases, Central South University, Changsha, 410013, Hunan, China.*

**Content..... page**

**(2''S)-2'',3''-dihydrodelicaflavone (1)**

|                                                                                                                 |   |
|-----------------------------------------------------------------------------------------------------------------|---|
| <b>Figure S1.</b> HRESIMS spectrum of <b>1</b> .....                                                            | 1 |
| <b>Figure S2.</b> <sup>1</sup> H NMR spectrum (500 MHz) of <b>1</b> in DMSO- <i>d</i> <sub>6</sub> .....        | 1 |
| <b>Figure S3.</b> <sup>13</sup> C NMR spectrum (125 MHz) of <b>1</b> in DMSO- <i>d</i> <sub>6</sub> .....       | 2 |
| <b>Figure S4.</b> DEPT 135 spectrum (125 MHz) of <b>1</b> in DMSO- <i>d</i> <sub>6</sub> .....                  | 2 |
| <b>Figure S5.</b> <sup>1</sup> H- <sup>1</sup> H COSY spectrum of <b>1</b> in DMSO- <i>d</i> <sub>6</sub> ..... | 3 |
| <b>Figure S6.</b> HSQC spectrum of <b>1</b> in DMSO- <i>d</i> <sub>6</sub> .....                                | 3 |
| <b>Figure S7.</b> HMBC spectrum of <b>1</b> in DMSO- <i>d</i> <sub>6</sub> .....                                | 4 |

**6''-methyldelicaflavone (2)**

|                                                                                                                  |   |
|------------------------------------------------------------------------------------------------------------------|---|
| <b>Figure S8.</b> HRESIMS spectrum of <b>2</b> .....                                                             | 4 |
| <b>Figure S9.</b> <sup>1</sup> H NMR spectrum (500 MHz) of <b>2</b> in DMSO- <i>d</i> <sub>6</sub> .....         | 5 |
| <b>Figure S10.</b> <sup>13</sup> C NMR spectrum (125 MHz) of <b>2</b> in DMSO- <i>d</i> <sub>6</sub> .....       | 5 |
| <b>Figure S11.</b> DEPT 135 spectrum (125 MHz) of <b>2</b> in DMSO- <i>d</i> <sub>6</sub> .....                  | 6 |
| <b>Figure S12.</b> <sup>1</sup> H- <sup>1</sup> H COSY spectrum of <b>2</b> in DMSO- <i>d</i> <sub>6</sub> ..... | 6 |
| <b>Figure S13.</b> HSQC spectrum of <b>2</b> in DMSO- <i>d</i> <sub>6</sub> .....                                | 7 |
| <b>Figure S14.</b> HMBC spectrum of <b>2</b> in DMSO- <i>d</i> <sub>6</sub> .....                                | 7 |

**7-O-methyldelicaflavone (3)**

|                                                                                                                  |    |
|------------------------------------------------------------------------------------------------------------------|----|
| <b>Figure S15.</b> HRESIMS spectrum of <b>3</b> .....                                                            | 8  |
| <b>Figure S16.</b> <sup>1</sup> H NMR spectrum (500 MHz) of <b>3</b> in DMSO- <i>d</i> <sub>6</sub> .....        | 8  |
| <b>Figure S17.</b> <sup>13</sup> C NMR spectrum (125 MHz) of <b>3</b> in DMSO- <i>d</i> <sub>6</sub> .....       | 9  |
| <b>Figure S18.</b> DEPT 135 spectrum (125 MHz) of <b>3</b> in DMSO- <i>d</i> <sub>6</sub> .....                  | 9  |
| <b>Figure S19.</b> <sup>1</sup> H- <sup>1</sup> H COSY spectrum of <b>3</b> in DMSO- <i>d</i> <sub>6</sub> ..... | 10 |
| <b>Figure S20.</b> HSQC spectrum of <b>3</b> in DMSO- <i>d</i> <sub>6</sub> .....                                | 10 |
| <b>Figure S21.</b> HMBC spectrum of <b>3</b> in DMSO- <i>d</i> <sub>6</sub> .....                                | 11 |

**(2''S)-6''-methyl-2'',3''-dihydrodelicaflavone (4)**

|                                                                                                            |    |
|------------------------------------------------------------------------------------------------------------|----|
| <b>Figure S22.</b> HRESIMS spectrum of <b>4</b> .....                                                      | 11 |
| <b>Figure S23.</b> <sup>1</sup> H NMR spectrum (800 MHz) of <b>4</b> in DMSO- <i>d</i> <sub>6</sub> .....  | 12 |
| <b>Figure S24.</b> <sup>13</sup> C NMR spectrum (200 MHz) of <b>4</b> in DMSO- <i>d</i> <sub>6</sub> ..... | 12 |

|                                                                                                                  |    |
|------------------------------------------------------------------------------------------------------------------|----|
| <b>Figure S25.</b> DEPT 135 spectrum (125 MHz) of <b>4</b> in DMSO- <i>d</i> <sub>6</sub> .....                  | 13 |
| <b>Figure S26.</b> <sup>1</sup> H- <sup>1</sup> H COSY spectrum of <b>4</b> in DMSO- <i>d</i> <sub>6</sub> ..... | 13 |
| <b>Figure S27.</b> HSQC spectrum of <b>4</b> in DMSO- <i>d</i> <sub>6</sub> .....                                | 14 |
| <b>Figure S28.</b> HMBC spectrum of <b>4</b> in DMSO- <i>d</i> <sub>6</sub> .....                                | 14 |
| <b>Figure S29.</b> Effects of compounds <b>1-3</b> on expression of caspase-3/cleaved caspase-3. ....            | 15 |

x51#82 RT: 0.61 AV: 1 NL: 1.19E6  
T: FIMS+pESI Full ms [400.00-700.00]

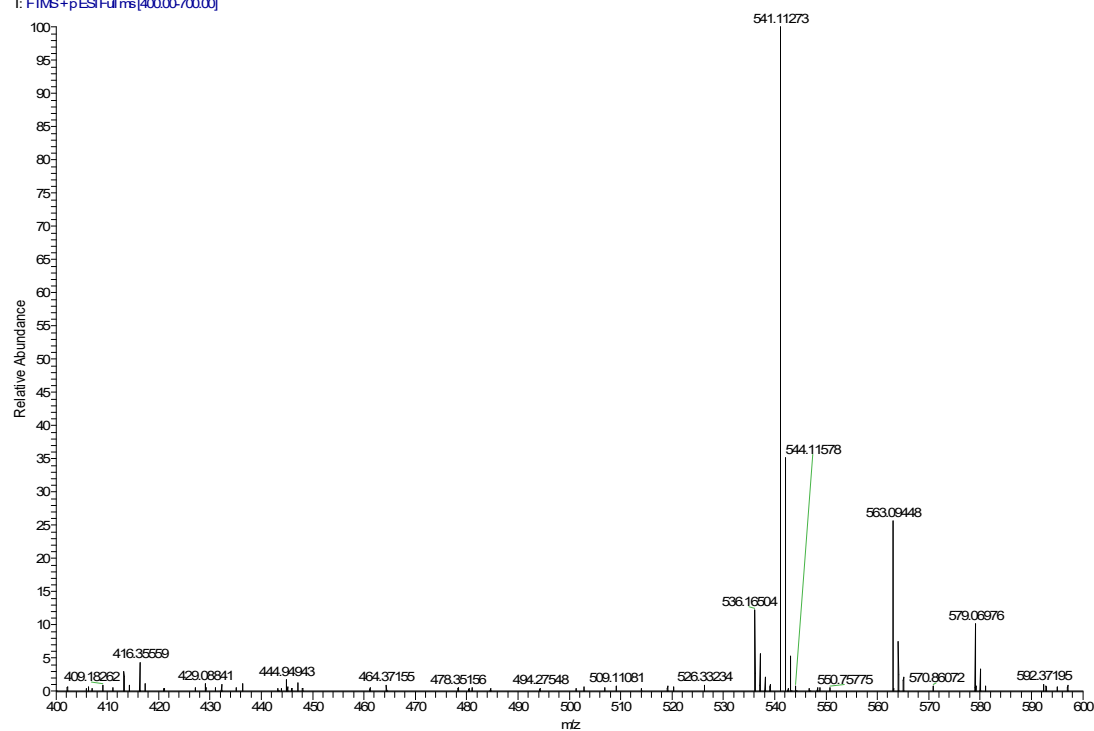

| m/z Theo. | Mass      | Delta (mmu) | RDB equiv. | Composition                                     |
|-----------|-----------|-------------|------------|-------------------------------------------------|
| 541.11273 | 541.11292 | -0.19       | 20.5       | C <sub>30</sub> H <sub>21</sub> O <sub>10</sub> |

Figure S1. HRESIMS spectrum of 1

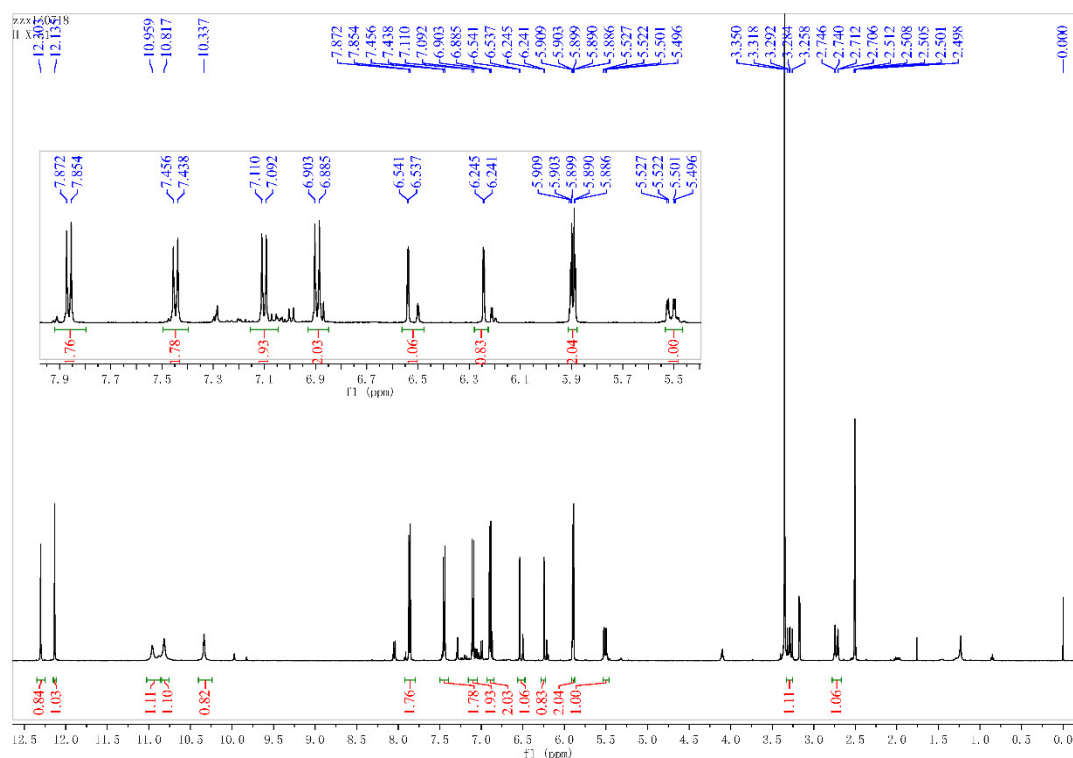

**Figure S2.**  $^1\text{H}$  NMR spectrum (500 MHz) of **1** in  $\text{DMSO-}d_6$

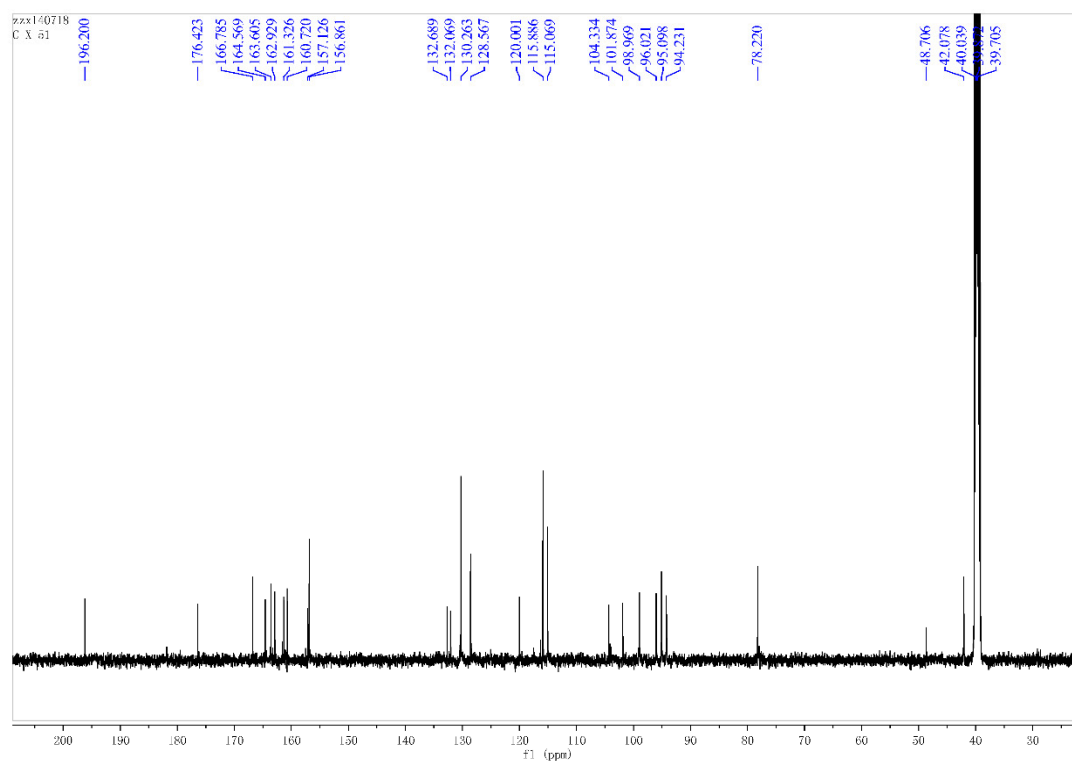

**Figure S3.**  $^{13}\text{C}$  NMR spectrum (125 MHz) of **1** in  $\text{DMSO-}d_6$

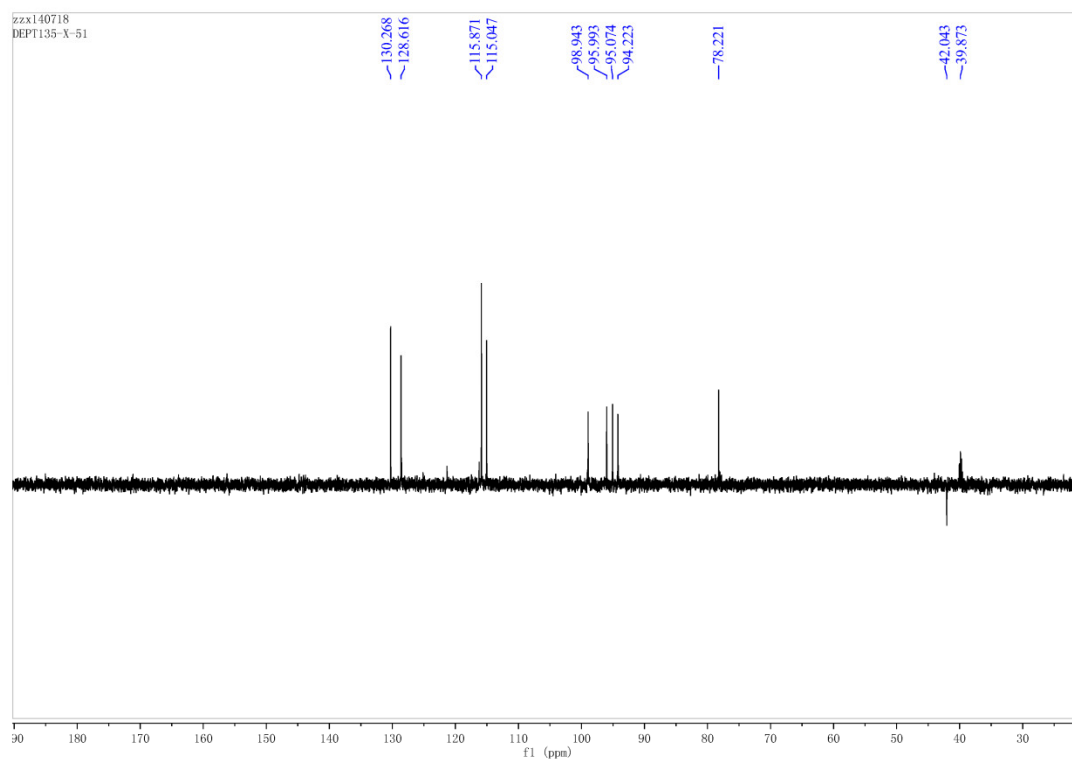

**Figure S4.** DEPT 135 spectrum (125 MHz) of **1** in  $\text{DMSO-}d_6$

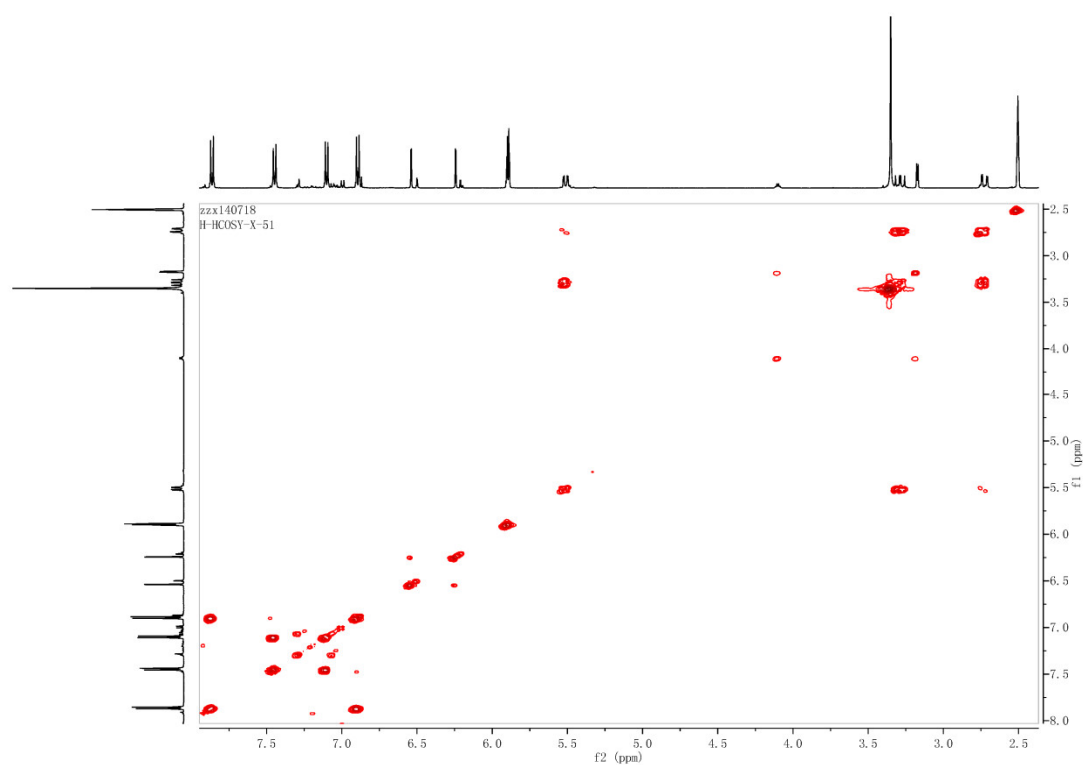

**Figure S5.**  $^1\text{H}$ - $^1\text{H}$  COSY spectrum of **1** in  $\text{DMSO-}d_6$

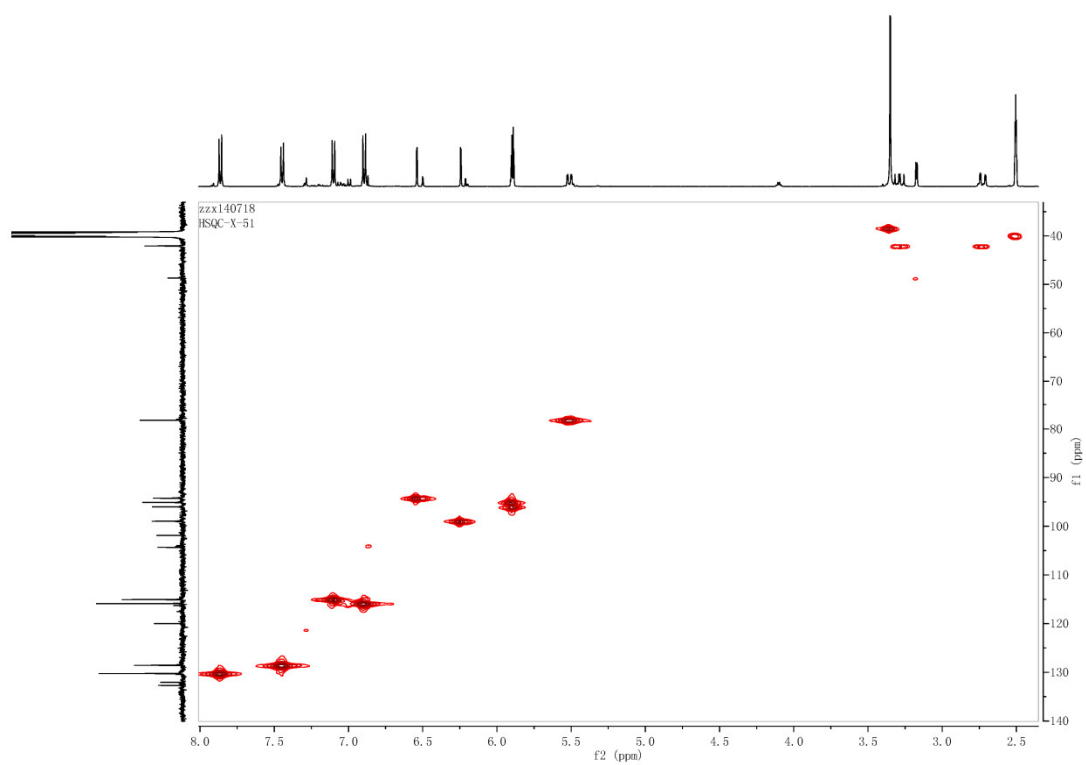

**Figure S6.** HSQC spectrum of **1** in  $\text{DMSO-}d_6$

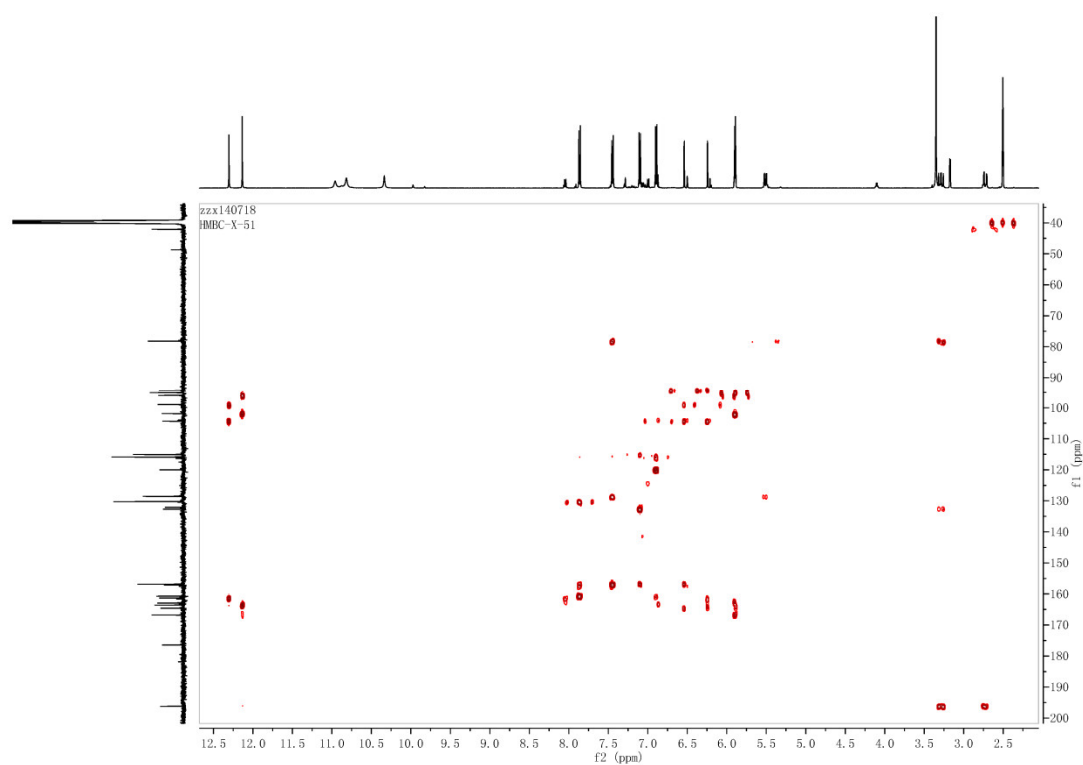

**Figure S7.** HMBC spectrum of **1** in DMSO-*d*<sub>6</sub>

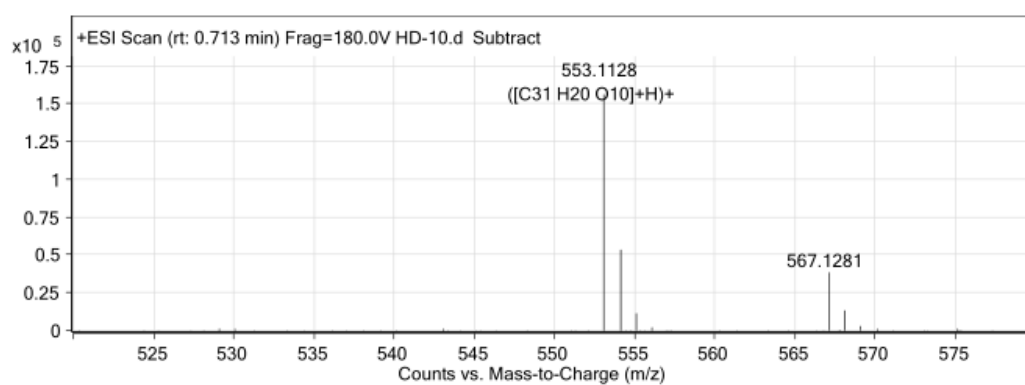

**Figure S8.** HRESIMS spectrum of **2**

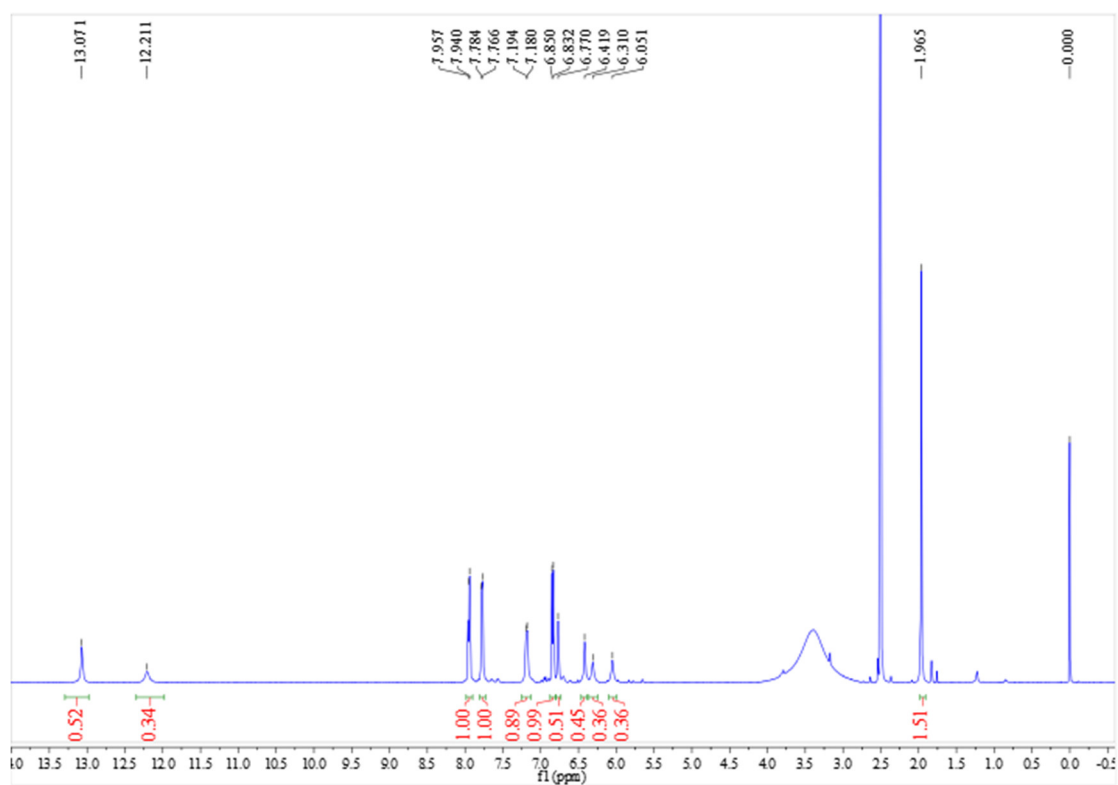

**Figure S9.** <sup>1</sup>H NMR spectrum (500 MHz) of **2** in DMSO-*d*<sub>6</sub>

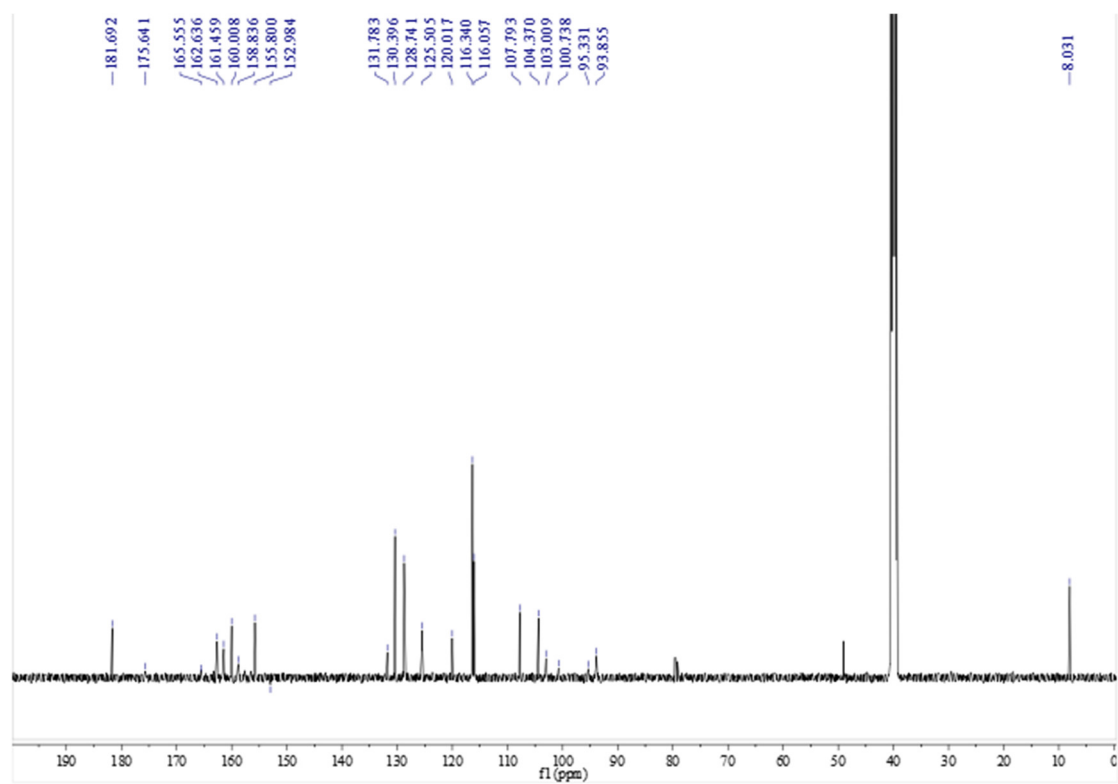

**Figure S10.** <sup>13</sup>C NMR spectrum (125 MHz) of **2** in DMSO-*d*<sub>6</sub>



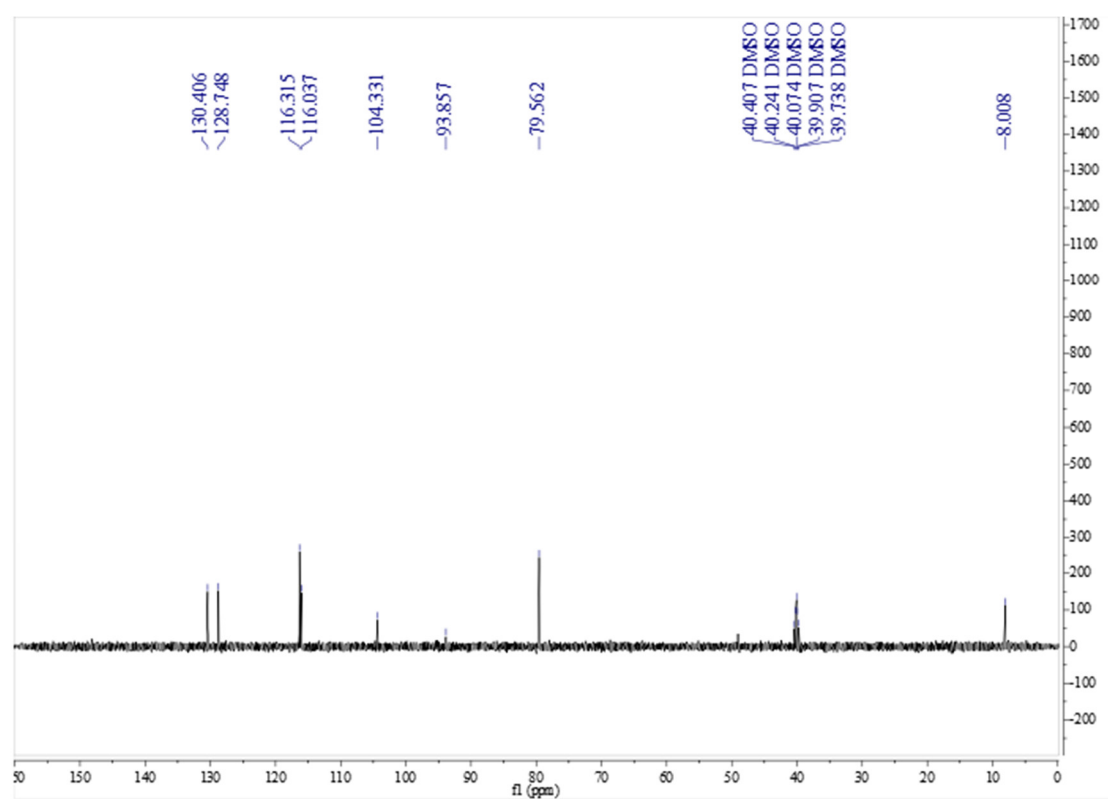

**Figure S11.** DEPT 135 spectrum (125 MHz) of **2** in DMSO-*d*<sub>6</sub>

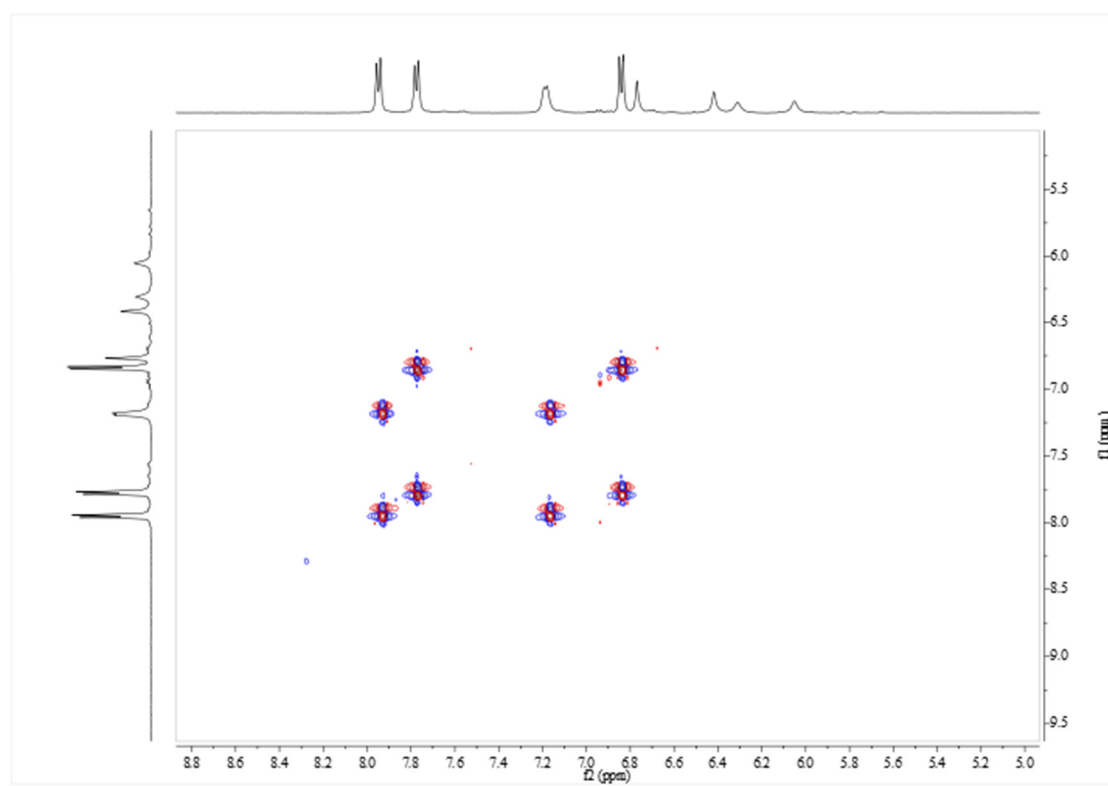

**Figure S12.** <sup>1</sup>H-<sup>1</sup>H COSY spectrum of **2** in DMSO-*d*<sub>6</sub>

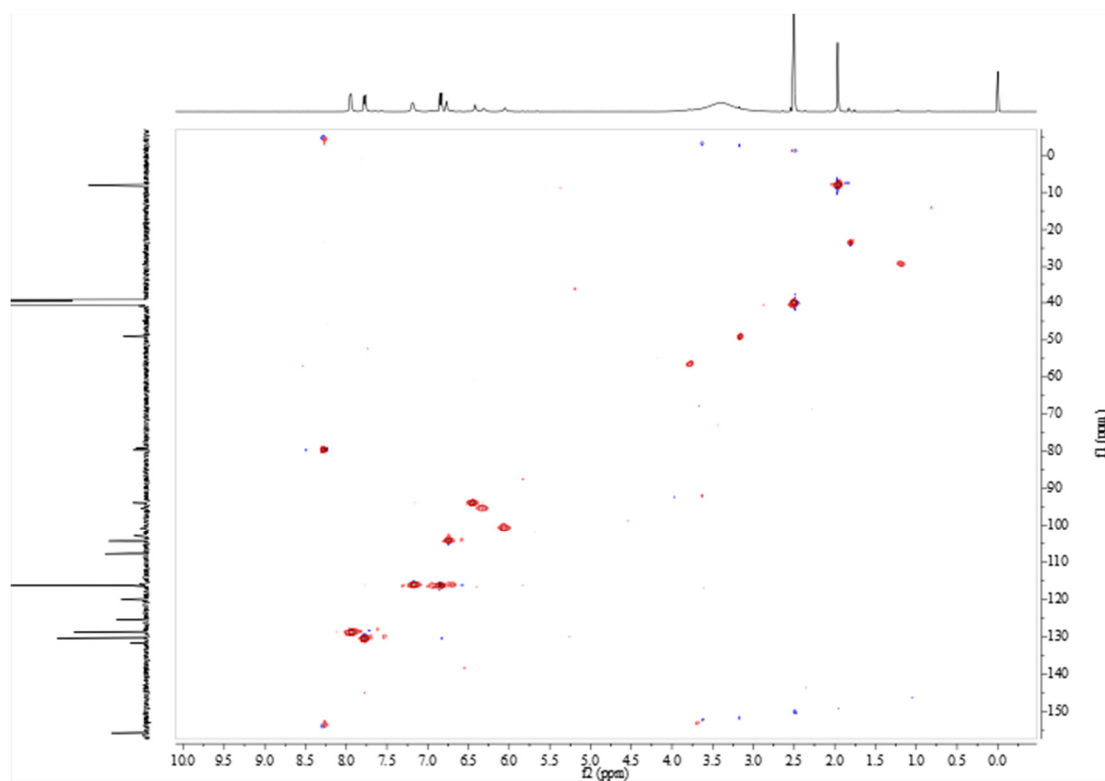

**Figure S13.** HSQC spectrum of **2** in DMSO-*d*<sub>6</sub>

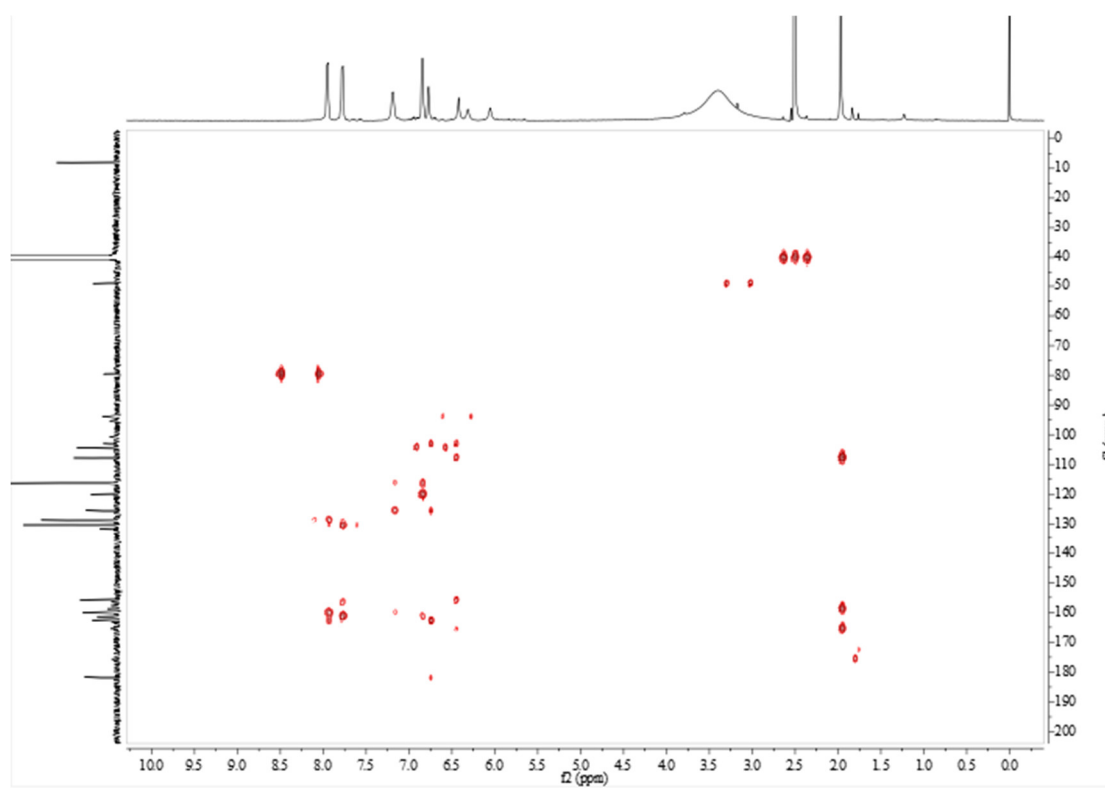

**Figure S14.** HMBC spectrum of **2** in DMSO-*d*<sub>6</sub>

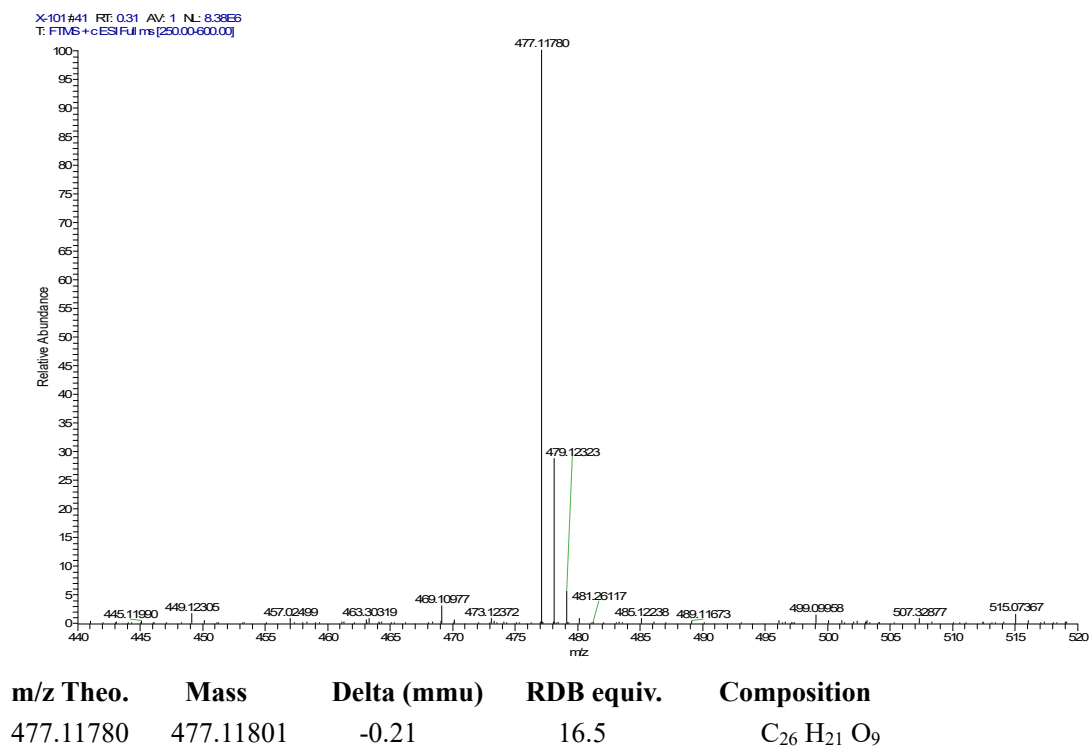

Figure S15. HRESIMS spectrum of **3**

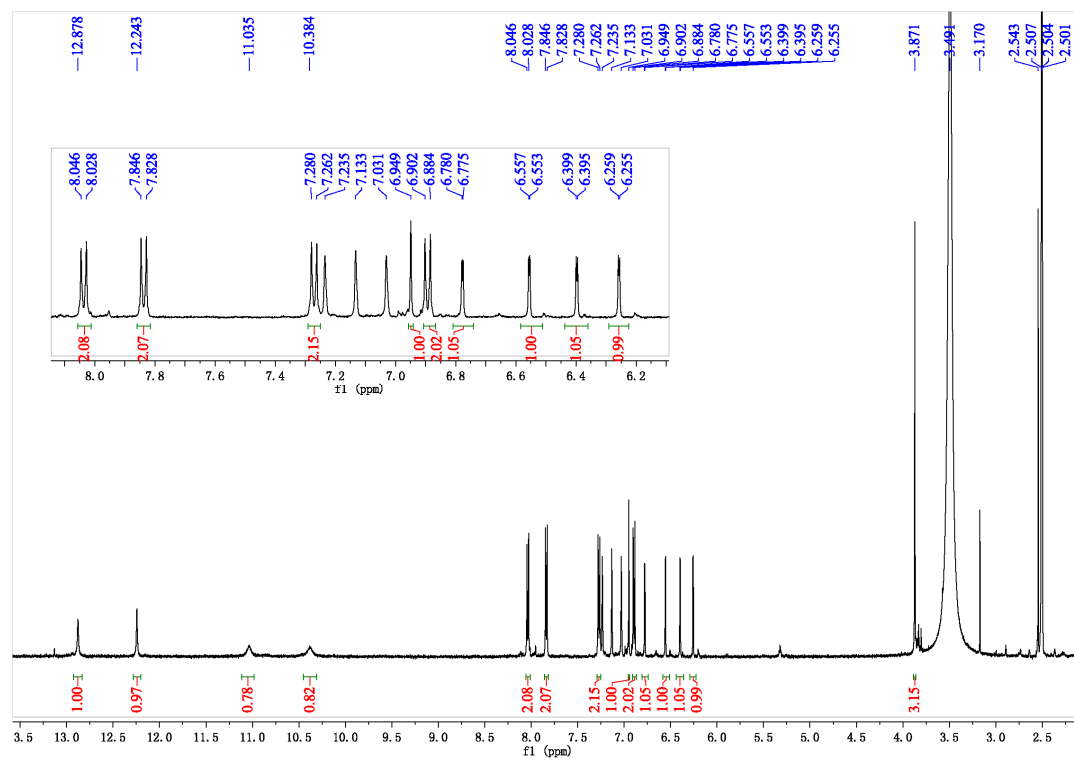

Figure S16. <sup>1</sup>H NMR spectrum (500 MHz) of **3** in DMSO-*d*<sub>6</sub>

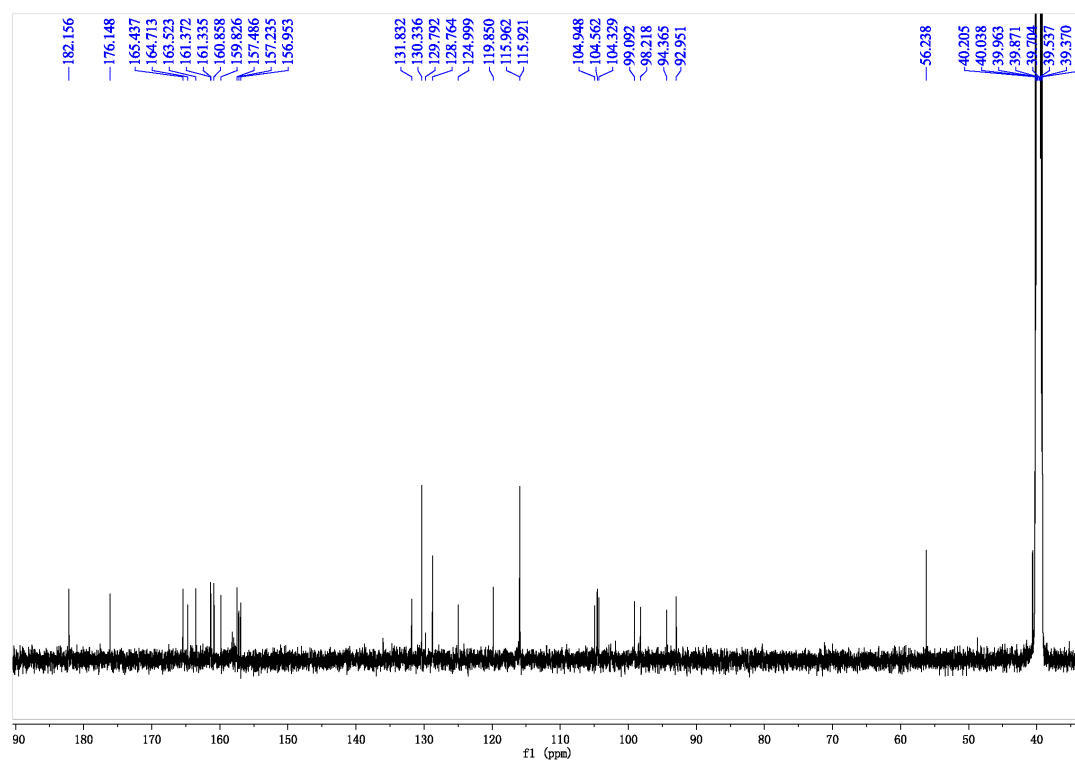

Figure S17.  $^{13}\text{C}$  NMR spectrum (125 MHz) of **3** in  $\text{DMSO-}d_6$

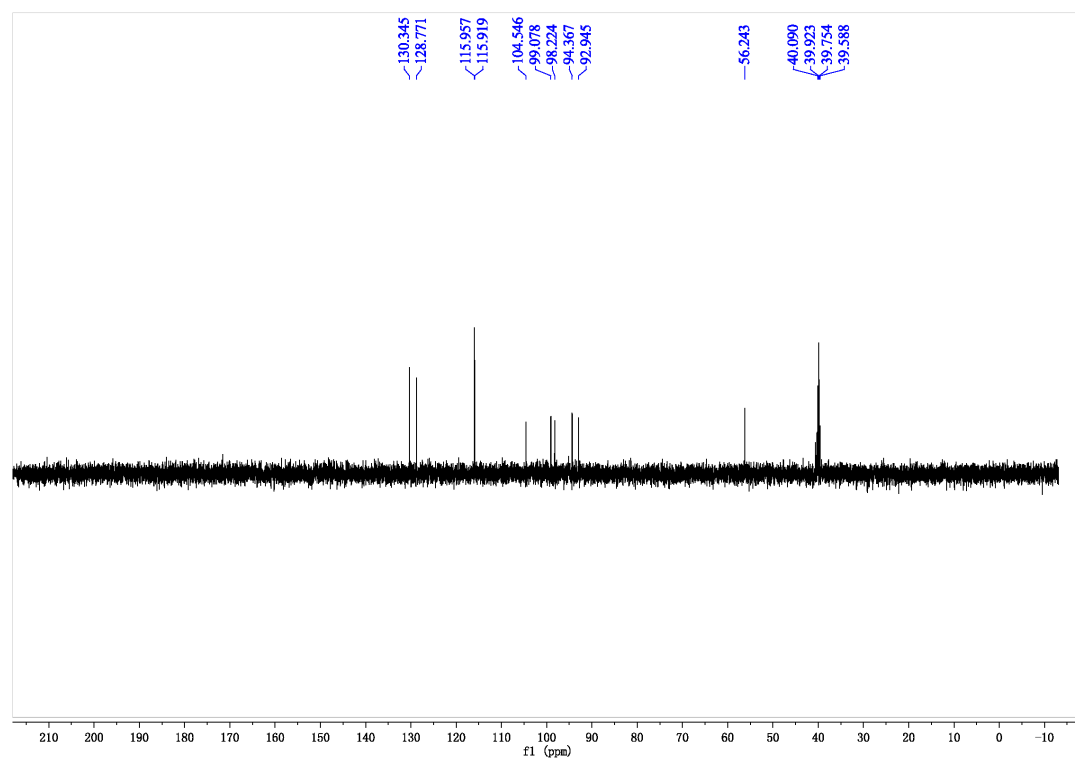

Figure S18. DEPT 135 spectrum (125 MHz) of **3** in  $\text{DMSO-}d_6$

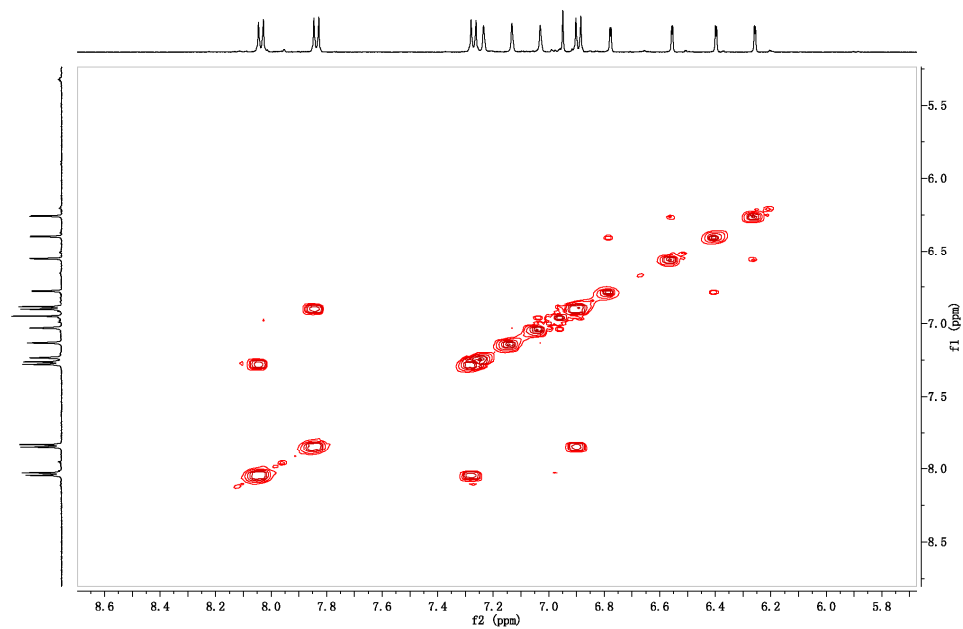

**Figure S19.**  $^1\text{H}$ - $^1\text{H}$  COSY spectrum of **3** in  $\text{DMSO-}d_6$

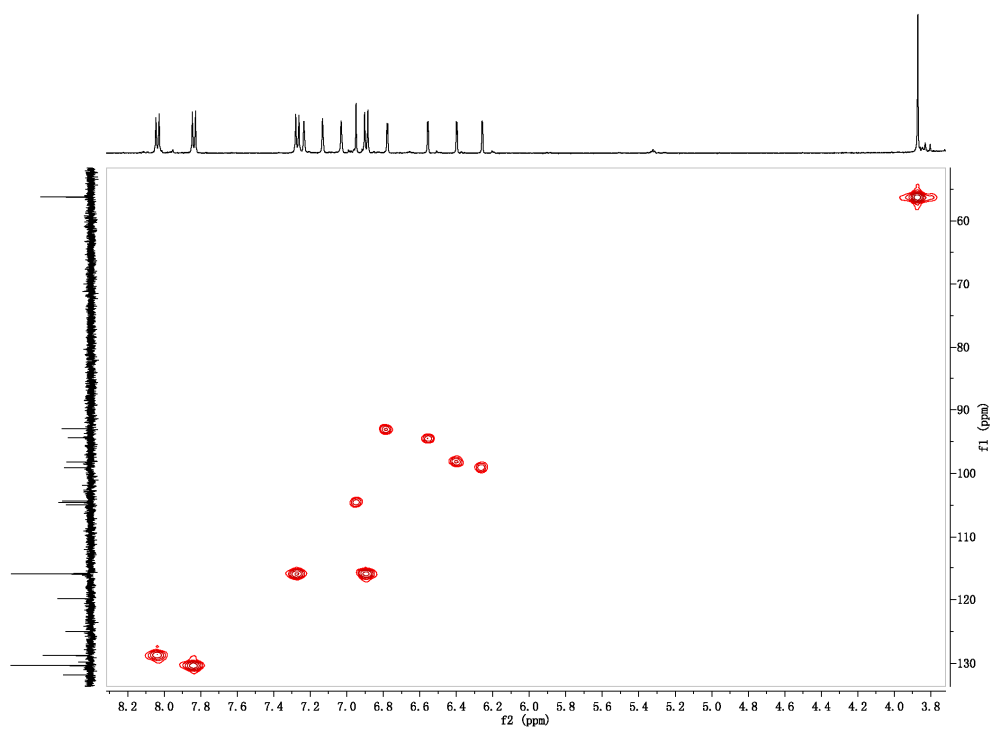

**Figure S20.** HSQC spectrum of **3** in  $\text{DMSO-}d_6$

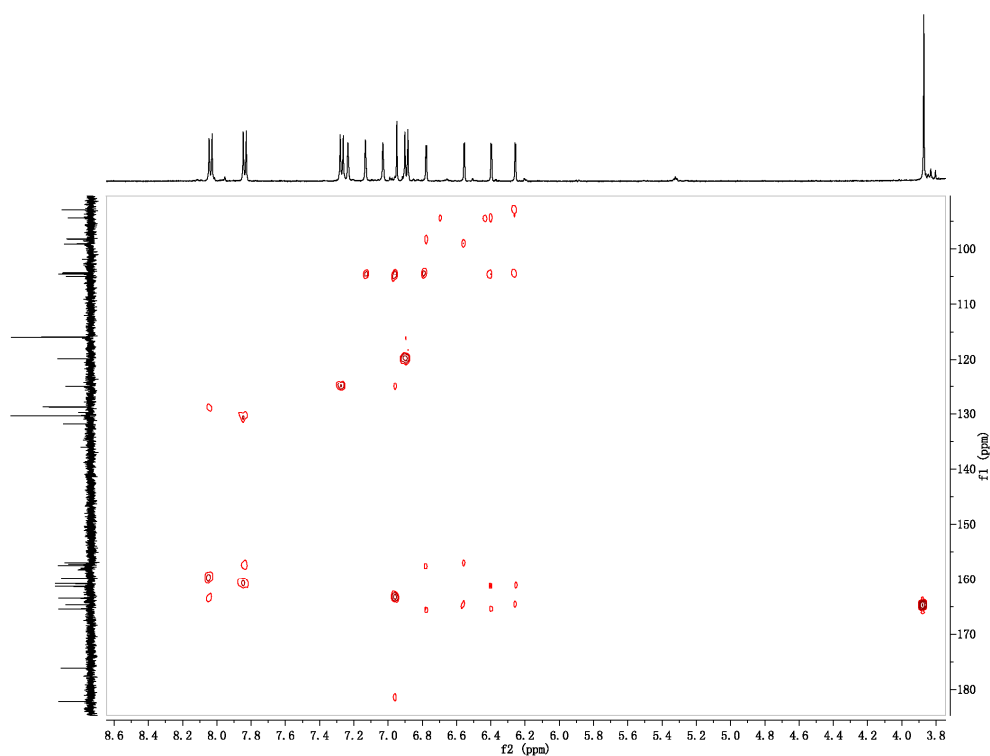

**Figure S21.** HMBC spectrum of **3** in DMSO-*d*<sub>6</sub>

x78 150116115011#8 RE: 0.17 AV: 1 NL: 6.38E5  
T: FTMS+pESI Full ms[400.00-700.00]

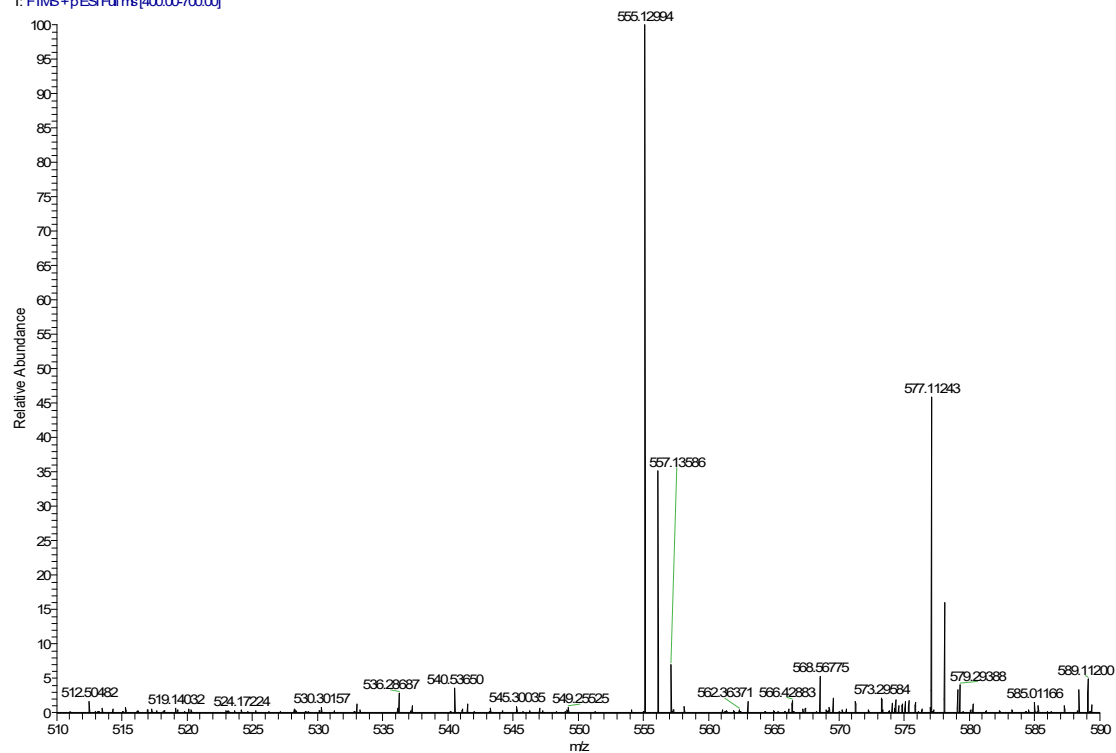

| m/z Theo. | Mass      | Delta (mmu) | RDB equiv. | Composition                                     |
|-----------|-----------|-------------|------------|-------------------------------------------------|
| 555.12994 | 555.12857 | 1.37        | 20.5       | C <sub>31</sub> H <sub>23</sub> O <sub>10</sub> |

**Figure S22.** HRESIMS spectrum of **4**

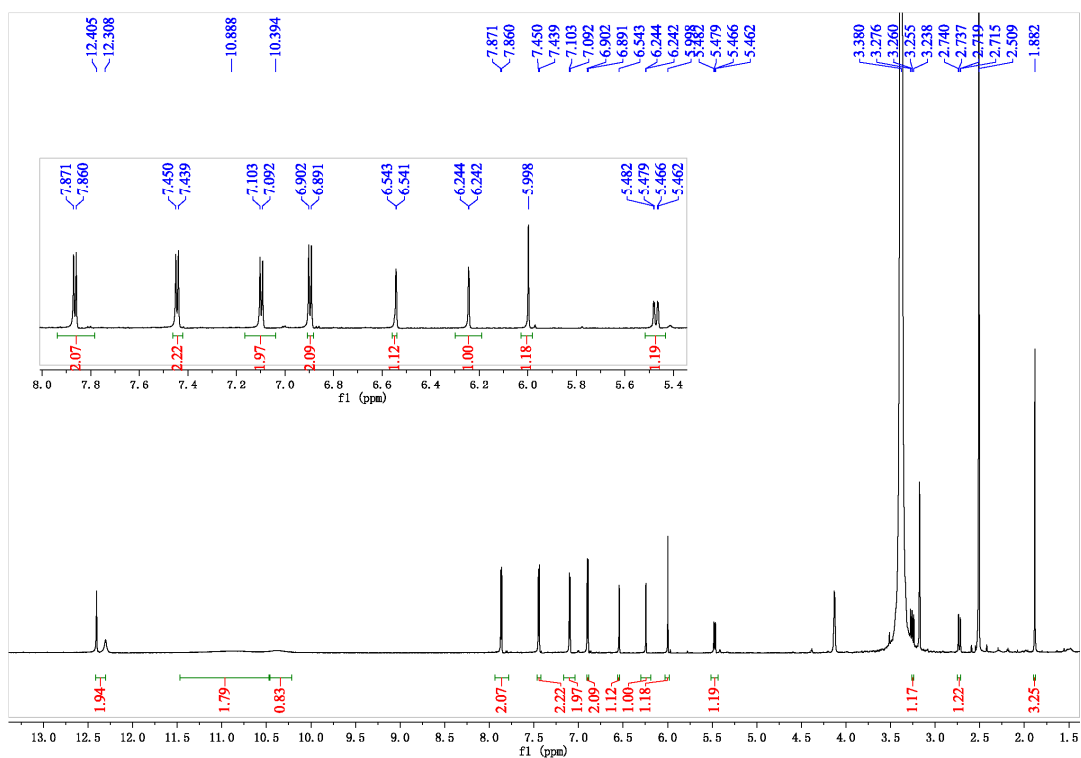

**Figure S23.** <sup>1</sup>H NMR spectrum (800 MHz) of **4** in DMSO-*d*<sub>6</sub>

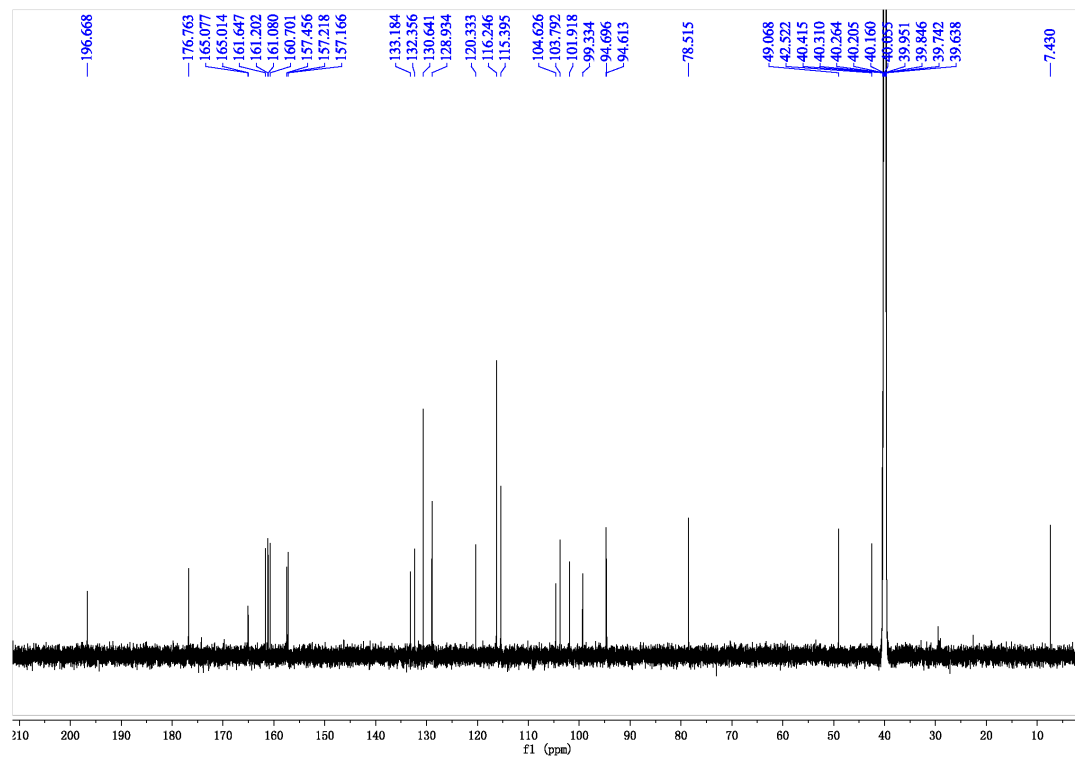

**Figure S24.** <sup>13</sup>C NMR spectrum (200 MHz) of **4** in DMSO-*d*<sub>6</sub>

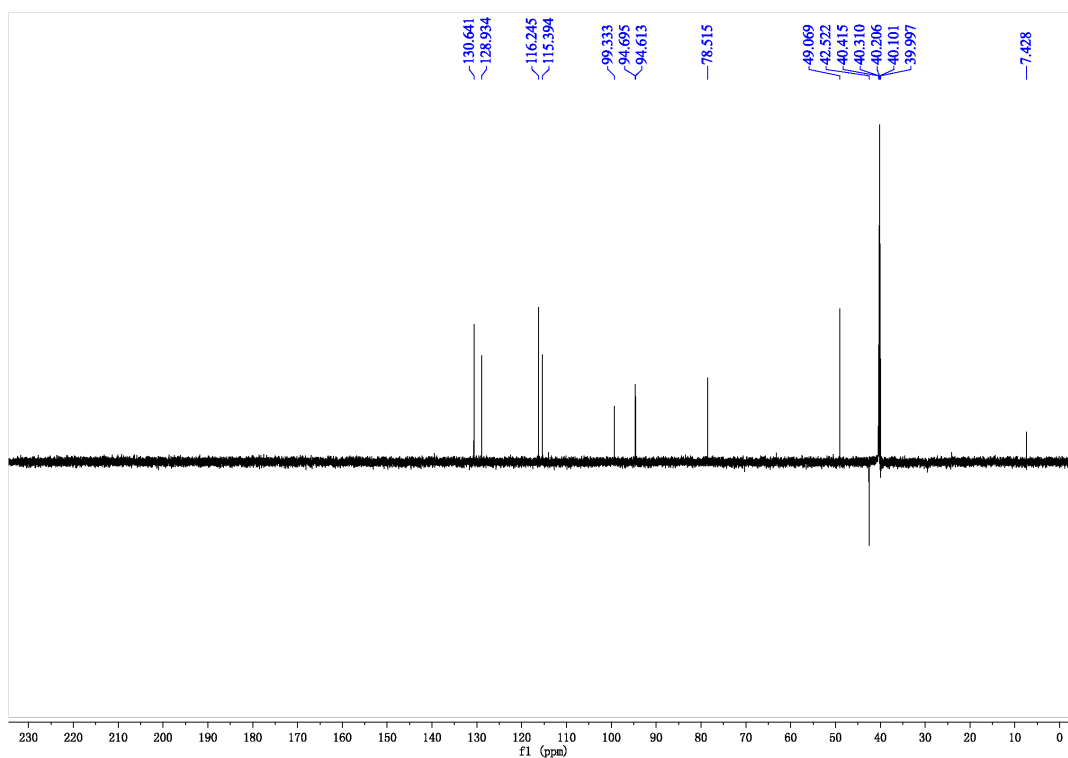

**Figure S25.** DEPT 135 spectrum (125 MHz) of **4** in DMSO-*d*<sub>6</sub>

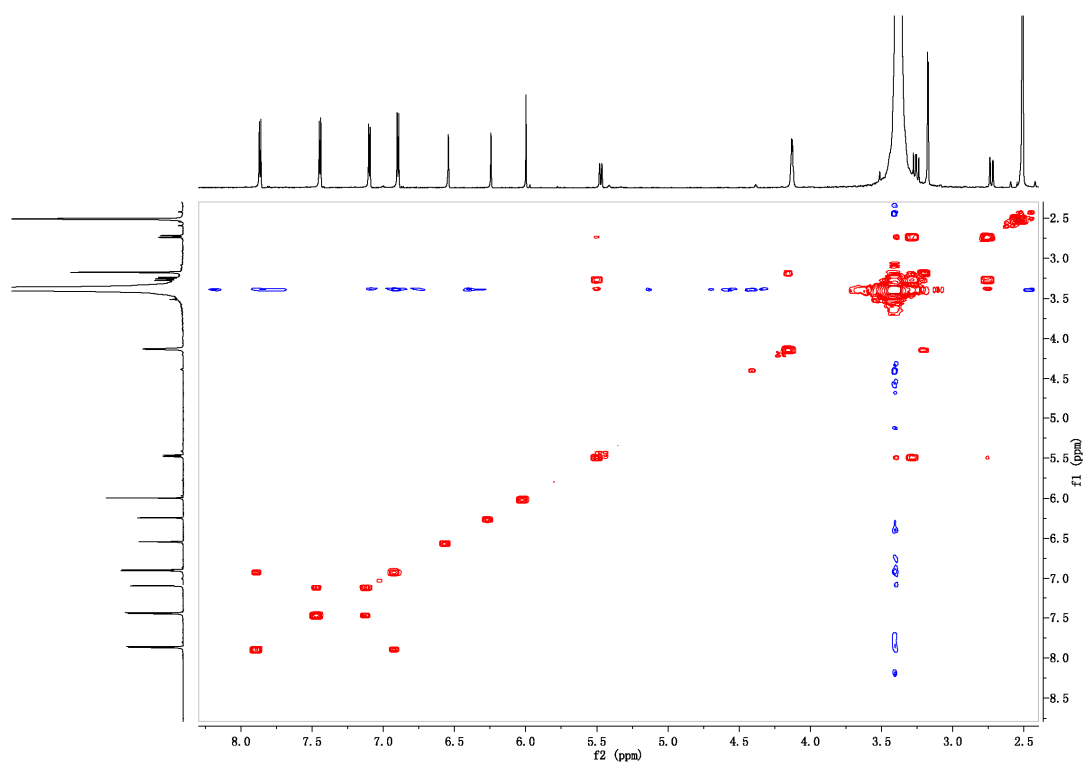

**Figure S26.** <sup>1</sup>H-<sup>1</sup>H COSY spectrum of **4** in DMSO-*d*<sub>6</sub>



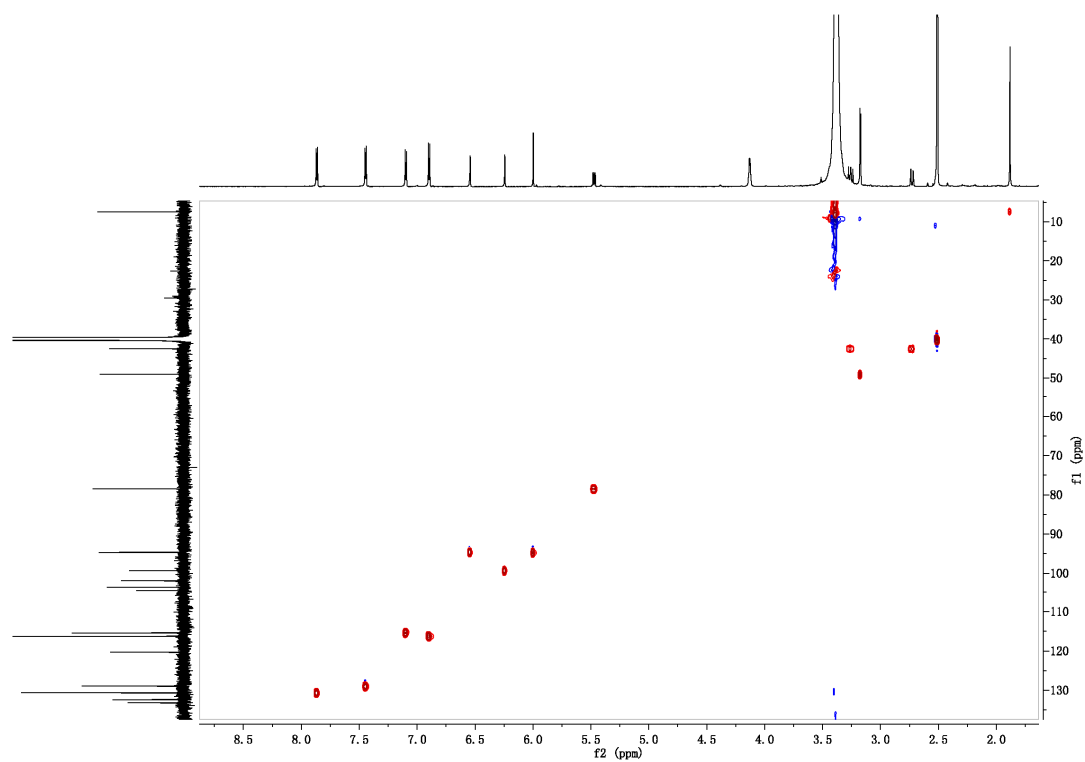

**Figure S27.** HSQC spectrum of **4** in DMSO-*d*<sub>6</sub>

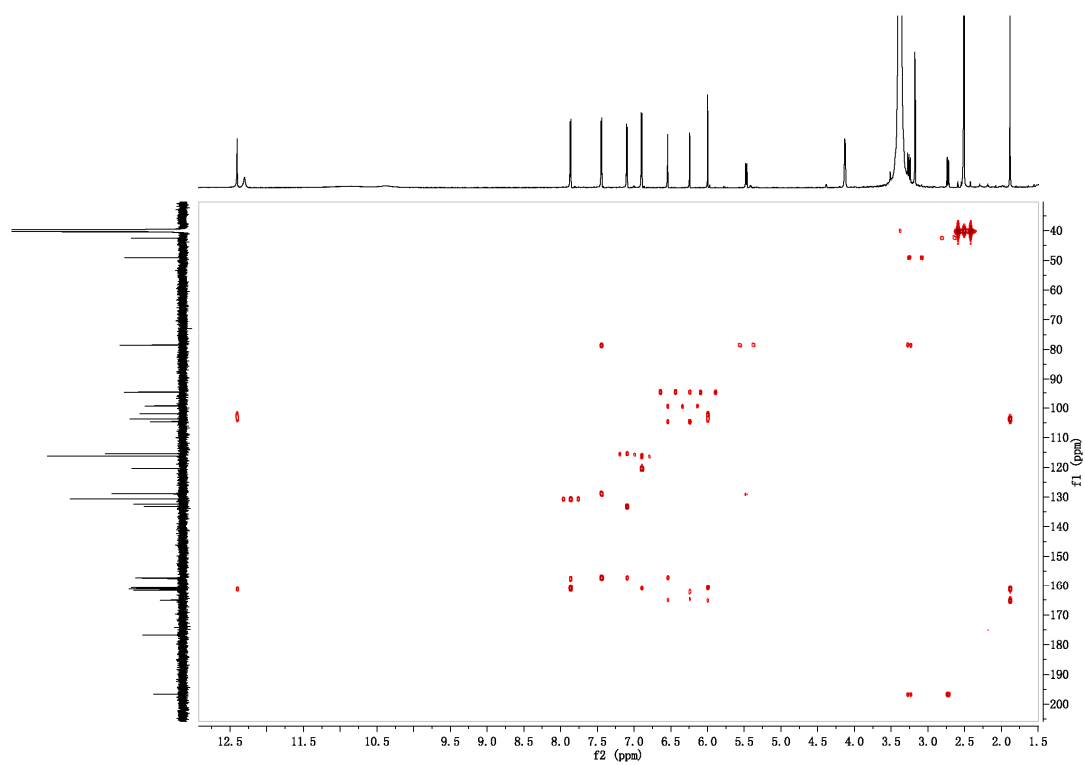

**Figure S28.** HMBC spectrum of **4** in DMSO-*d*<sub>6</sub>

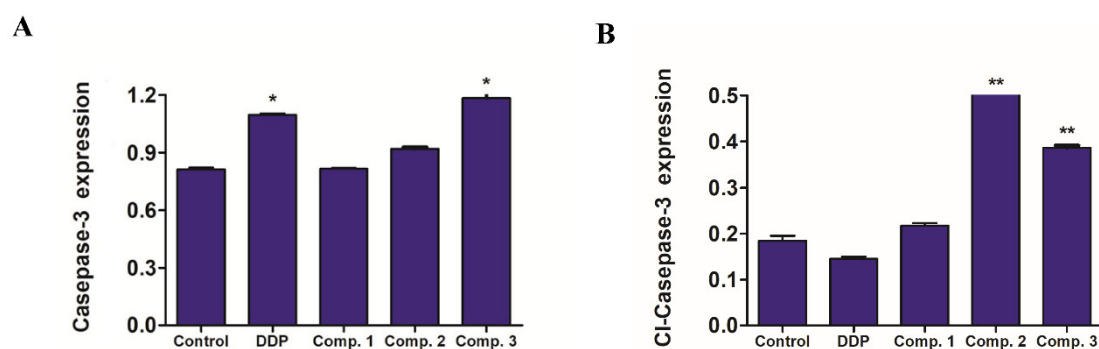

**Figure S29.** Effects of compounds **1-3** on expression of caspase-3 and cleaved caspase-3. A549 cells were treated with vehicle or the indicated compound for 24 h, and the relative levels of caspase-3 and cleaved caspase-3 were determined by western blot assays using  $\beta$ -actin as a control. (A) Quantitative analysis of caspase-3. (B) Quantitative analysis of cleaved caspase-3. Data are expressed as **means** from three independent experiments. \* $P < 0.05$ , \*\* $P < 0.01$  vs control group.
